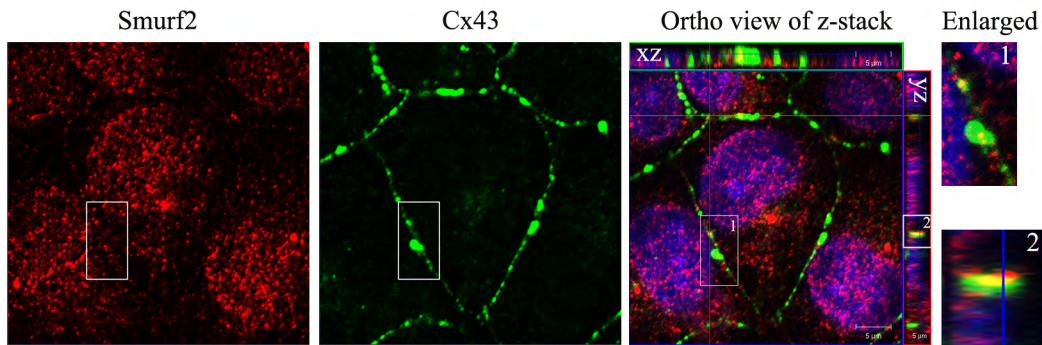

**Fig. S1. Co-localization between Smurf2 and Cx43 in gap junctions in untreated cells.** Cells were double-stained with anti-Cx43 and anti-Smurf2 antibodies and visualized using immunofluorescence confocal microscopy. Z-stack images were acquired at 0.38  $\mu\text{m}$  intervals, and xy view as well as z-sectional views (xz and yz) are presented in the ortho view of the z-stack. Merged image is shown in the right panel, with yellow indicating co-localization between Cx43 and Smurf2. Representative Cx43 gap junctions showing co-localization with Smurf2 are presented in the enlarged images 1 (xy view) and 2 (zy view). Scale bar, 5  $\mu\text{m}$ .

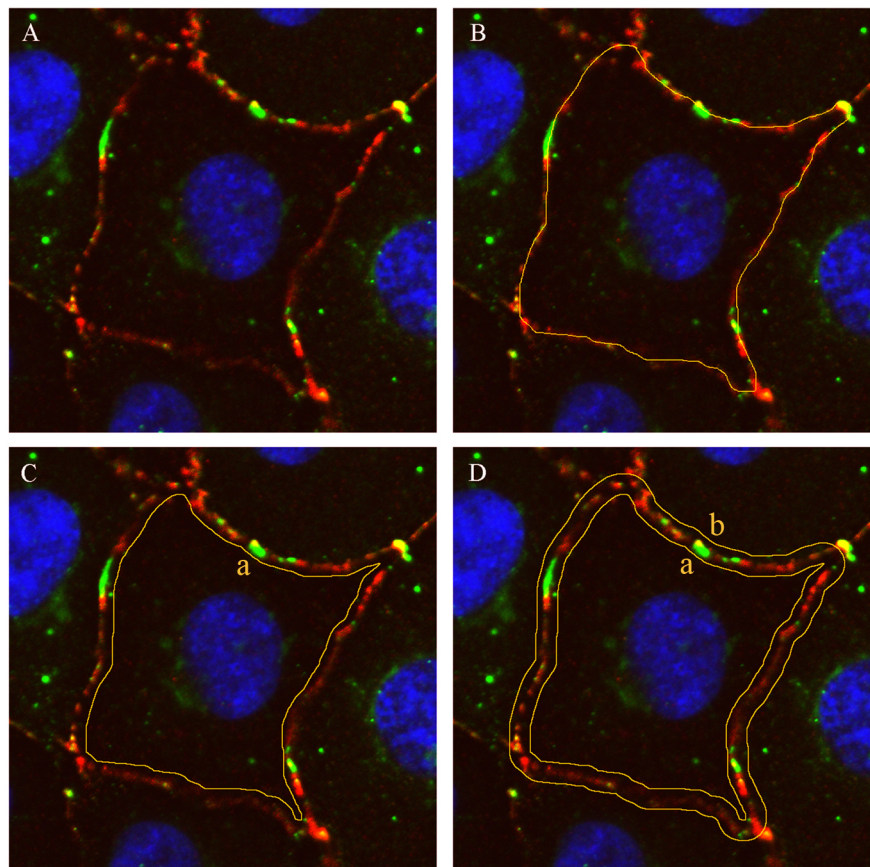

**Fig. S2. Quantification of Cx43 at the plasma membrane.** (A-D) IAR20 cells were fixed, stained with anti-Cx43 (green) and anti-occludin (red) antibodies and visualized using immunofluorescence confocal microscopy. Cx43 staining in the plasma membrane in percent of total cellular Cx43 in the same focal plane was quantified using ImageJ software as described in the 'Materials and Methods' section.
